# Supplementary material for: Prevalence and natural history of depression after stroke: A systematic review and meta-analysis of observational studies
Source: PubMed Central journal article supplement (PMC10047522; doi:10.1371/journal.pmed.1004200), 2023-03-28
Supplement: pmed.1004200.s011.pdf [file pmed.1004200.s011.pdf]

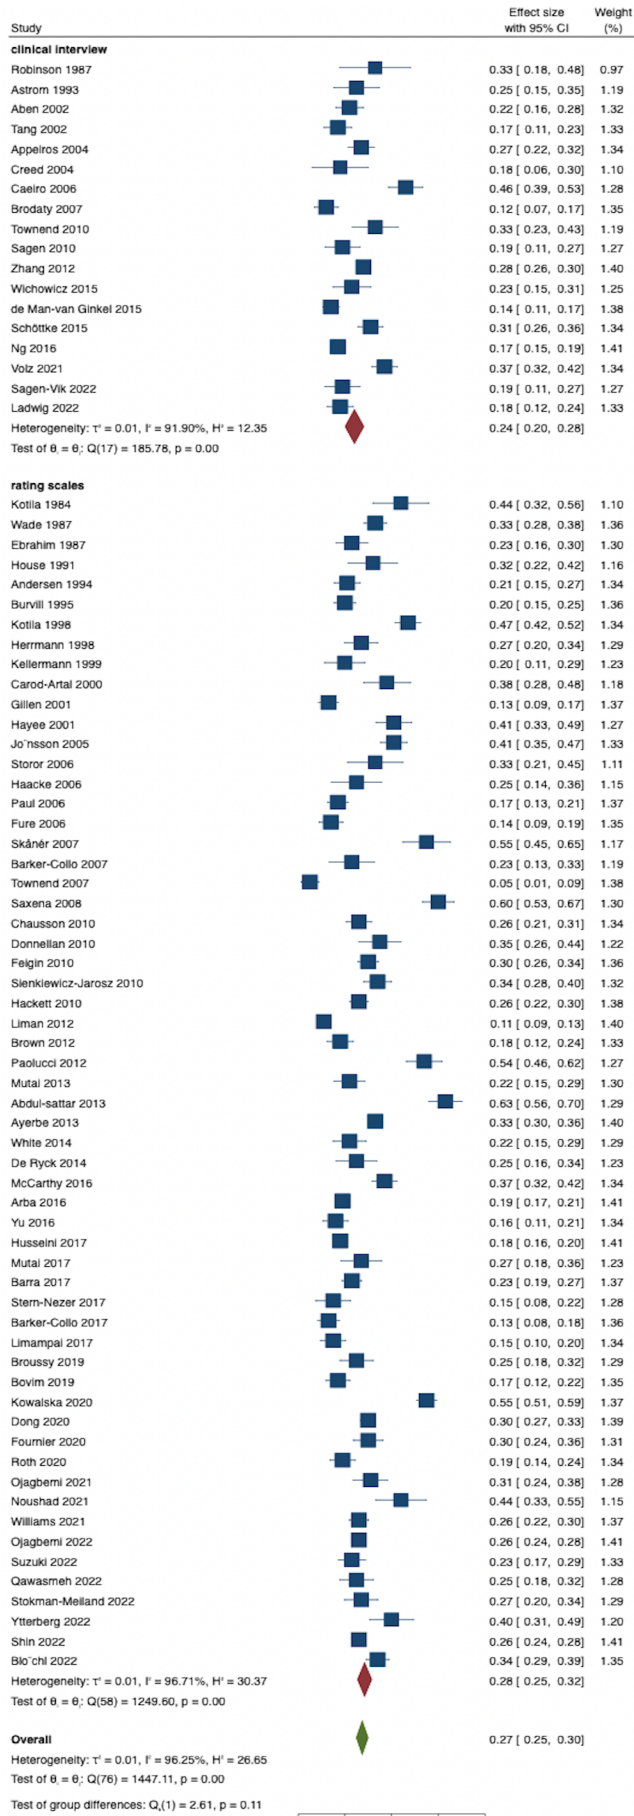

Random-effects REML model

## Reference

1. Robinson RG, Bolduc PL, Price TR. Two-year longitudinal study of poststroke mood disorders: Diagnosis and outcome at one and two years. *Stroke*. 1987;18(5):837-43.
2. Astrom M, Adolfsson R, Asplund K. Major depression in stroke patients: A 3-year longitudinal study. *Stroke*. 1993;24(7):976-82.
3. Aben I, Verhey F, Lousberg R, et al. Validity of the Beck depression inventory, hospital anxiety and depression scale, SCL-90, and Hamilton depression rating scale as screening instruments for depression in stroke patients. *Psychosomatics* 2002;43:386–93.
4. Tang WK, Ungvari GS, Chiu HFK, Sze KH, Woo J, Kay R. Psychiatric morbidity in first time stroke patients in Hong Kong: A pilot study in a rehabilitation unit. *Australian and New Zealand Journal of Psychiatry*. 2002;36(4):544-9.
5. Appelros P, Viitanen M. Prevalence and predictors of depression at one year in a Swedish population-based cohort with first-ever stroke. *Journal of Stroke and Cerebrovascular Diseases*. 2004;13(2):52-7.
6. Creed A, Swanwick G, O'Neill D. Screening for post stroke depression in patients with acute stroke including those with communication disorders. *International Journal of Geriatric Psychiatry*. 2004;19(6):595-7.
7. Caeiro L, Ferro JM, Santos CO, Figueira ML. Depression in acute stroke. *Journal of Psychiatry and Neuroscience*. 2006;31(6):377-83.
8. Brodaty H, Withall A, Altendorf A, Sachdev PS. Rates of depression at 3 and 15 months poststroke and their relationship with cognitive decline: The Sydney stroke study. *American Journal of Geriatric Psychiatry*. 2007;15(6):477-86.
9. Townend BS, Whyte S, Desborough T, Crimmins D, Markus R, Levi C, et al. Longitudinal prevalence and determinants of early mood disorder post-stroke. *J Clin Neurosci*. 2007;14(5):429-34.
10. Sagen U, Finset A, Moum T, Morland T, Vik TG, Nagy T, et al. Early detection of patients at risk for anxiety, depression and apathy after stroke. *General Hospital Psychiatry*. 2010;32(1):80-5.
11. Zhang N, Wang CX, Wang AX, Bai Y, Zhou Y, Wang YL, et al. Time course of depression and one-year prognosis of patients with stroke in mainland China. *CNS Neuroscience & Therapeutics*. 2012;18(6):475-81.

12. Wichowicz HM, Gasecki D, Lass P, Landowski J, Swierkocka M, Wisniewski G, et al. Clinical utility of chosen factors in predicting post-stroke depression: a one year follow-up. *Psychiatr Pol.* 2015;49(4):683-96.
13. De Man-Van Ginkel JM, Hafsteinsdottir TB, Lindeman E, Geerlings MI, Grobbee DE, Schuurmans MJ. Clinical Manifestation of Depression after Stroke: Is It Different from Depression in Other Patient Populations? *PLoS ONE.* 2015;10(12).
14. Schottke H, Giabbiconi CM. Post-stroke depression and post-stroke anxiety: Prevalence and predictors. *International Psychogeriatrics.* 2015;27(11):1805-12.
15. Ng YS, Tan KH, Chen C, Senolos GC, Koh GC. How Do Recurrent and First-Ever Strokes Differ in Rehabilitation Outcomes? *American journal of physical medicine & rehabilitation.* 2016;95(10):709-17.
16. Volz M, Ladwig S, Werheid K. Gender differences in post-stroke depression: A longitudinal analysis of prevalence, persistence and predictive value of known risk factors. *Neuropsychological rehabilitation.* 2021;31(1):1-17.
17. Sagen-Vik U, Finset A, Moum T, Vik TG, Dammen T. The longitudinal course of anxiety, depression and apathy through two years after stroke. *Journal of Psychosomatic Research.* 2022;162.
18. Ladwig S, Ziegler M, Sudmeyer M, Werheid K. The Post-Stroke Depression Risk Scale (PoStDeRis): Development of an Acute-Phase Prediction Model for Depression 6 Months After Stroke. *Journal of the Academy of Consultation-Liaison Psychiatry.* 2022;63(2):144-52.
19. Kotila M, Waltimo O, Niemi ML, Laaksonen R, Lempinen M. The profile of recovery from stroke and factors influencing outcome. *Stroke.* 1984;15(6):1039-44.
20. Wade DT, Legh-Smith J, Hewer RA. Depressed mood after stroke. A community study of its frequency. *British Journal of Psychiatry.* 1987;151(AUG.):200-5.
21. Ebrahim S, Barer D, Nouri F. Affective illness after stroke. *British Journal of Psychiatry.* 1987;151:52-6.
22. House A, Dennis M, Mogridge L, Warlow C, Hawton K, Jones L. Mood disorders in the year after first stroke. *British Journal of Psychiatry.* 1991;158(JAN.):83-92.
23. Andersen G, Vestergaard K, Riis JO, Lauritzen L. Incidence of post-stroke depression during the first year in a large unselected stroke population determined using a valid standardized rating scale. *Acta Psychiatrica Scandinavica.* 1994;90(3):190-5.

24. Burvill PW, Johnson GA, Jamrozik KD, Anderson CS, Stewart-Wynne EG, Chakera TMH. Prevalence of depression after stroke: The Perth Community Stroke Study. *British Journal of Psychiatry*. 1995;166(MAR.):320-7.
25. Kotila M, Numminen H, Waltimo O, Kaste M. Depression after stroke: Results of the FINNSTROKE study. *Stroke*. 1998;29(2):368-72.
26. Herrmann N, Black SE, Lawrence J, Szekely C, Szalai JP. The Sunnybrook stroke study - A prospective study of depressive symptoms and functional outcome. *Stroke*. 1998;29(3):618-24.
27. Kellermann M, Fekete I, Gesztelyi R, Csiba L, Kollar J, Sikula J, et al. Screening for depressive symptoms in the acute phase of stroke. *General Hospital Psychiatry*. 1999;21(2):116-21.
28. Carod-Artal J, Egado JA, Gonzalez JL, de Seijas EV. Quality of life among stroke survivors evaluated 1 year after stroke - Experience of a stroke unit. *Stroke*. 2000;31(12):2995-3000.
29. Gillen R, Tennen H, McKee TE, Gernert-Dott P, Affleck G. Depressive symptoms and history of depression predict rehabilitation efficiency in stroke patients. *Arch Phys Med Rehabil*. 2001;82(12):1645-9.
30. Hayee MA, Akhtar N, Haque A, Rabbani MG. Depression after stroke-analysis of 297 stroke patients. *Bangladesh Medical Research Council Bulletin*. 2001;27(3):96-102.
31. Jonsson AC, Lindgren I, Hallstrom B, Norrving B, Lindgren A. Determinants of quality of life in stroke survivors and their informal caregivers. *Stroke*. 2005;36(4):803-8.
32. Storor DL, Byrne GJ. Pre-morbid personality and depression following stroke. *International Psychogeriatrics*. 2006;18(3):457-69.
33. Haacke C, Althaus A, Spottke A, Siebert U, Back T, Dodel R. Long-term outcome after stroke - Evaluating health-related quality of life using utility measurements. *Stroke*. 2006;37(1):193-8.
34. Paul SL, Dewey HM, Sturm JW, Macdonell RAL, Thrift AG. Prevalence of depression and use of antidepressant medication at 5-years poststroke in the North East Melbourne stroke incidence study. *Stroke*. 2006;37(11):2854-5.
35. Fure B, Wyller TB, Engedal K, Thommessen B. Emotional symptoms in acute ischemic stroke. *International Journal of Geriatric Psychiatry*. 2006;21(4):382-7.

36. Skaner Y, Nilsson GH, Sundquist K, Hassler E, Krakau I. Self-rated health, symptoms of depression and general symptoms at 3 and 12 months after a first-ever stroke: A municipality-based study in Sweden. *BMC Family Practice*. 2007;8.
37. Barker-Collo SL. Depression and anxiety 3 months post stroke: Prevalence and correlates. *Archives of Clinical Neuropsychology*. 2007;22(4):519-31.
38. Townend BS, Whyte S, Desborough T, Crimmins D, Markus R, Levi C, et al. Longitudinal prevalence and determinants of early mood disorder post-stroke. *J Clin Neurosci*. 2007;14(5):429-34.
39. Saxena SK, Ng TP, Yong D, Fong NP, Koh G. Subthreshold depression and cognitive impairment but not demented in stroke patients during their rehabilitation. *Acta Neurologica Scandinavica*. 2008;117(2):133-40.
40. Chausson N, Olindo S, Cabre P, Saint-Vil M, Smadja D. Five-year outcome of a stroke cohort in martinique, French West Indies: Etude realisee en martinique et centree sur l'incidence des accidents vasculaires cerebraux, part 2. *Stroke*. 2010;41(4):594-9.
41. Donnellan C, Hickey A, Hevey D, O'Neill D. Effect of mood symptoms on recovery one year after stroke. *International Journal of Geriatric Psychiatry*. 2010;25(12):1288-95.
42. Feigin VL, Barker-Collo S, Parag V, Senior H, Lawes CMM, Ratnasabapathy Y, et al. Auckland Stroke Outcomes Study: Part 1: Gender, stroke types, ethnicity, and functional outcomes 5 years poststroke. *Neurology*. 2010;75(18):1597-607.
43. Sienkiewicz-Jarosz H, Milewska D, Bochynska A, Chelminiak A, Dworek N, Kasprzyk K, et al. Predictors of depressive symptoms in patients with stroke - a three-month follow-up. *Neurol Neurochir Pol*. 2010;44(1):13-20.
44. Hackett ML, Hill KM, Hewison J, Anderson CS, House AO. Stroke Survivors Who Score below Threshold on Standard Depression Measures May Still Have Negative Cognitions of Concern. *Stroke*. 2010;41(3):478-81.
45. Liman TG, Heuschmann PU, Endres M, Floel A, Schwab S, Kolominsky-Rabas PL. Impact of low mini-mental status on health outcome up to 5 years after stroke: the Erlangen Stroke Project. *J Neurol*. 2012;259(6):1125-30.
46. Brown C, Hasson H, Thyselius V, Almborg AH. Post-stroke depression and functional independence: A conundrum. *Acta Neurologica Scandinavica*. 2012;126(1):45-51.

47. Paolucci S, Di Vita A, Massicci R, Traballese M, Bureca I, Matano A, et al. Impact of participation on rehabilitation Results: A multivariate study. *European Journal of Physical and Rehabilitation Medicine*. 2012;48(3):455-66.
48. Mutai H, Furukawa T, Araki K, Misawa K, Hanihara T. Long-term outcome in stroke survivors after discharge from a convalescent rehabilitation ward. *Psychiatry and Clinical Neurosciences*. 2013;67(6):434-40.
49. Abdul-sattar AB, Godab T. Predictors of functional outcome in Saudi Arabian patients with stroke after inpatient rehabilitation. *Neurorehabilitation*. 2013;33(2):209-16.
50. Ayerbe L, Ayis S, Crichton S, Wolfe CDA, Rudd AG. The natural history of depression up to 15 years after stroke: The South London stroke register. *Stroke*. 2013;44(4):1105-10.
51. White JH, Attia J, Sturm J, Carter G, Magin P. Predictors of depression and anxiety in community dwelling stroke survivors: a cohort study. *Disability and rehabilitation*. 2014;36(23):1975-82.
52. De Ryck A, Franssen E, Brouns R, Geurden M, Peij D, Marien P, et al. Poststroke depression and its multifactorial nature: Results from a prospective longitudinal study. *Journal of the Neurological Sciences*. 2014;347(1-2):159-66.
53. McCarthy MJ, Sucharew HJ, Alwell K, Moomaw CJ, Woo D, Flaherty ML, et al. Age, subjective stress, and depression after ischemic stroke. *Journal of behavioral medicine*. 2016;39(1):55-64.
54. Arba F, Ali M, Quinn TJ, Hankey GJ, Lees KR, Inzitari D. Lacunar Infarcts, Depression, and Anxiety Symptoms One Year after Stroke. *Journal of Stroke and Cerebrovascular Diseases*. 2016;25(4):831-4.
55. Yu S, Arima H, Bertmar C, Hiraoka Y, Priglinger M, Evans K, et al. Depression but not anxiety predicts recurrent cerebrovascular events. *Acta Neurologica Scandinavica*. 2016;134(1):29-34.
56. El Hussein N, Goldstein LB, Peterson ED, Zhao X, Olson DM, Williams JW, Jr., et al. Depression Status Is Associated with Functional Decline Over 1-Year Following Acute Stroke. *Journal of Stroke & Cerebrovascular Diseases*. 2017;26(7):1393-9.
57. Mutai H, Furukawa T, Houry A, Suzuki A, Hanihara T. Factors associated with multidimensional aspect of post-stroke fatigue in acute stroke period. *Asian Journal of Psychiatry*. 2017;26:1-5.

58. Barra M, Evensen GSH, Valeberg BT. Cues and clues predicting presence of symptoms of depression in stroke survivors. *J Clin Nurs*. 2017;26(3-4):546-56.
59. Stern-Nezer S, Eyngorn I, Mlynash M, Snider RW, Venkatsubramanian C, Wijman CAC, et al. Depression one year after hemorrhagic stroke is associated with late worsening of outcomes. *Neurorehabilitation*. 2017;41(1):179-87.
60. Barker-Collo SL. Depression and anxiety 3 months post stroke: Prevalence and correlates. *Archives of Clinical Neuropsychology*. 2007;22(4):519-31.
61. Limampai P, Wongsrithep W, Kuptniratsaikul V. Depression after stroke at 12-month follow-up: a multicenter study. *International Journal of Neuroscience*. 2017;127(10):887-92.
62. Broussy S, Saillour-Glenisson F, Garcia-Lorenzo B, Rouanet F, Lesaine E, Maugeais M, et al. Sequelae and quality of life in patients living at home 1 year after a stroke managed in stroke units. *Frontiers in Neurology*. 2019;10(AUG).
63. Bovim MR, Lndredavik B, Hokstad A, Cumming T, Bernhardt J, Askim T. Relationship between pre-stroke physical activity and symptoms of post-stroke anxiety and depression. *J Rehabil Med*. 2019;51(10):755-60.
64. Kowalska K, Dros J, Mazurek M, Pasinska P, Gorzkowska A, Klimkowicz-Mrowiec A. Delirium post-stroke: Short-and long-term effect on depression, anxiety, apathy and aggression (research study-part of propolis study). *Journal of Clinical Medicine*. 2020;9(7):1-11
65. Dong L, Sanchez BN, Skolarus LE, Stulberg E, Morgenstern LB, Lisabeth LD. Sex difference in prevalence of depression after stroke. *Neurology*. 2020;94(19):e1973-e83.
66. Fournier LE, Beauchamp JES, Zhang X, Bonojo E, Love M, Cooksey G, et al. Assessment of the Progression of Poststroke Depression in Ischemic Stroke Patients Using the Patient Health Questionnaire-9. *Journal of Stroke & Cerebrovascular Diseases*. 2020;29(4):8.
67. Roth DL, Haley WE, Sheehan OC, Liu C, Clay OJ, Rhodes JD, et al. Depressive Symptoms After Ischemic Stroke Population-Based Comparisons of Patients and Caregivers With Matched Controls. *Stroke*. 2020;51(1):54-60.
68. Ojagbemi A, Bello T, Owolabi M, Baiyewu O. Prevalence, predictors, and prognoses of prestroke neuropsychiatric symptoms at 3 months poststroke. *International Psychogeriatrics*. 2021;33(8):827-34.

69. Noushad N, Sachita S, Varughese SA, Joy SK, Jose S. Post stroke depression and anxiety: Prevalance and correlates. *Asian Journal of Pharmaceutical and Clinical Research*. 2021;14(9):142-7.
70. Williams OA, Demeyere N. Association of Depression and Anxiety With Cognitive Impairment 6 Months After Stroke. *Neurology*. 2021;96(15):E1966-E74.
71. Ojagbemi A, Akinyemi J, Wahab K, Owolabi L, Arulogun O, Akpalu J, et al. Pre-Stroke Depression in Ghana and Nigeria: Prevalence, Predictors and Association With Poststroke Depression. *Journal of Geriatric Psychiatry and Neurology*. 2022;35(1):121-7.
72. Suzuki, A., et al. The Prevalence and Course of Neuropsychiatric Symptoms in Stroke Patients Impact Functional Recovery During in-Hospital Rehabilitation. *Topics in Stroke Rehabilitation* 29(1) (2022): 1-8.
73. Al Qawasmeh M, Aldabbour B, Abuabada A, Abdelrahman K, Elamassie S, Khweileh M, et al. Prevalence, Severity, and Predictors of Poststroke Depression in a Prospective Cohort of Jordanian Patients. *Stroke Research and Treatment*. 2022;2022:6506326.
74. Stokman-Meiland DCM, Groeneveld IF, Arwert HJ, van der Pas SL, Meesters JJJ, Mishre RRD, et al. The course of depressive symptoms in the first 12 months post-stroke and its association with unmet needs. *Disability and Rehabilitation*. 2022;44(3):428-35.
75. Ytterberg C, Cegrell L, von Koch L, Wiklander M. Depression symptoms 6 years after stroke are associated with higher perceived impact of stroke, limitations in ADL and restricted participation. *Scientific Reports*. 2022;12(1).
76. Shin M, Sohn MK, Lee J, Kim DY, Shin YI, Oh GJ, et al. Post-Stroke Depression and Cognitive Aging: A Multicenter, Prospective Cohort Study. *Journal of Personalized Medicine*. 2022;12(3).
77. Blochl M, Nestler S. Long-term Changes in Depressive Symptoms before and after Stroke. *Neurology*. 2022;99(7):E720-E9.
