# Supplementary material for: Prevalence and natural history of depression after stroke: A systematic review and meta-analysis of observational studies
Source: PubMed Central journal article supplement (PMC10047522; doi:10.1371/journal.pmed.1004200), 2023-03-28
Supplement: pmed.1004200.s013.pdf [file pmed.1004200.s013.pdf]

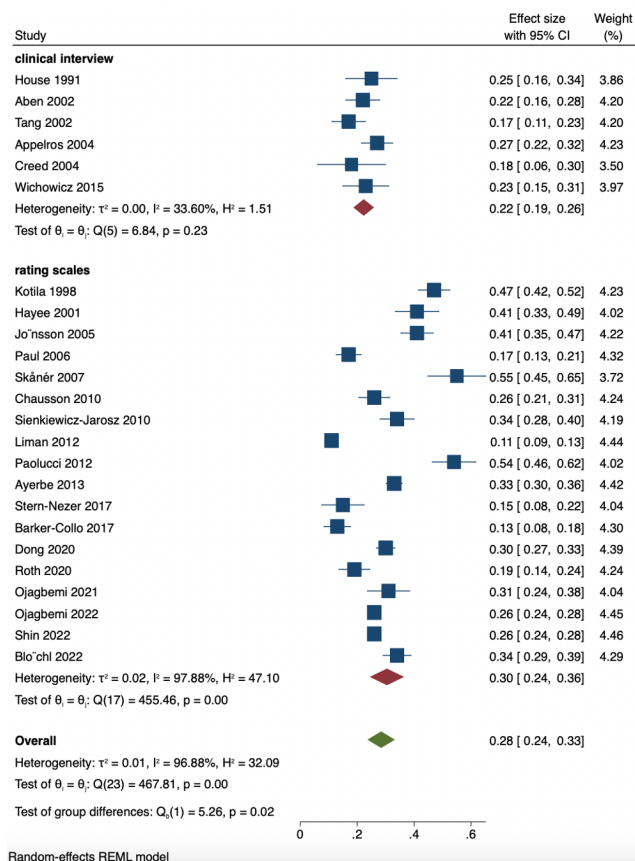

## Reference

1. House A, Dennis M, Mogridge L, Warlow C, Hawton K, Jones L. Mood disorders in the year after first stroke. *British Journal of Psychiatry*. 1991;158(JAN.):83-92.
2. Aben I, Verhey F, Lousberg R, et al. Validity of the Beck depression inventory, hospital anxiety and depression scale, SCL-90, and Hamilton depression rating scale as screening instruments for depression in stroke patients. *Psychosomatics* 2002;43:386–93.
3. Tang WK, Ungvari GS, Chiu HFK, Sze KH, Woo J, Kay R. Psychiatric morbidity in first time stroke patients in Hong Kong: A pilot study in a rehabilitation unit. *Australian and New Zealand Journal of Psychiatry*. 2002;36(4):544-9.
4. Appelros P, Viitanen M. Prevalence and predictors of depression at one year in a Swedish population-based cohort with first-ever stroke. *Journal of Stroke and Cerebrovascular Diseases*. 2004;13(2):52-7.
5. Creed A, Swanwick G, O'Neill D. Screening for post stroke depression in patients with acute stroke including those with communication disorders. *International Journal of Geriatric Psychiatry*. 2004;19(6):595-7.

6. Wichowicz HM, Gasecki D, Lass P, Landowski J, Swierkocka M, Wisniewski G, et al. Clinical utility of chosen factors in predicting post-stroke depression: a one year follow-up. *Psychiatr Pol.* 2015;49(4):683-96.
7. Kotila M, Numminen H, Waltimo O, Kaste M. Depression after stroke: Results of the FINNSTROKE study. *Stroke.* 1998;29(2):368-72.
8. Hayee MA, Akhtar N, Haque A, Rabbani MG. Depression after stroke-analysis of 297 stroke patients. *Bangladesh Medical Research Council Bulletin.* 2001;27(3):96-102.
9. Jonsson AC, Lindgren I, Hallstrom B, Norrving B, Lindgren A. Determinants of quality of life in stroke survivors and their informal caregivers. *Stroke.* 2005;36(4):803-8.
10. Paul SL, Dewey HM, Sturm JW, Macdonell RAL, Thrift AG. Prevalence of depression and use of antidepressant medication at 5-years poststroke in the North East Melbourne stroke incidence study. *Stroke.* 2006;37(11):2854-5.
11. Skaner Y, Nilsson GH, Sundquist K, Hassler E, Krakau I. Self-rated health, symptoms of depression and general symptoms at 3 and 12 months after a first-ever stroke: A municipality-based study in Sweden. *BMC Family Practice.* 2007;8.
12. Chausson N, Olindo S, Cabre P, Saint-Vil M, Smadja D. Five-year outcome of a stroke cohort in martinique, French West Indies: Etude realisee en martinique et centree sur l'incidence des accidents vasculaires cerebraux, part 2. *Stroke.* 2010;41(4):594-9.
13. Sienkiewicz-Jarosz H, Milewska D, Bochynska A, Chelminiak A, Dworek N, Kasprzyk K, et al. Predictors of depressive symptoms in patients with stroke - a three-month follow-up. *Neurol Neurochir Pol.* 2010;44(1):13-20.
14. Liman TG, Heuschmann PU, Endres M, Floel A, Schwab S, Kolominsky-Rabas PL. Impact of low mini-mental status on health outcome up to 5 years after stroke: the Erlangen Stroke Project. *J Neurol.* 2012;259(6):1125-30.
15. Paolucci S, Di Vita A, Massicci R, Traballes M, Bureca I, Matano A, et al. Impact of participation on rehabilitation Results: A multivariate study. *European Journal of Physical and Rehabilitation Medicine.* 2012;48(3):455-66.
16. Ayerbe L, Ayis S, Crichton S, Wolfe CDA, Rudd AG. The natural history of depression up to 15 years after stroke: The South London stroke register. *Stroke.* 2013;44(4):1105-10.
17. Stern-Nezer S, Eyngorn I, Mlynash M, Snider RW, Venkatsubramanian C, Wijman CAC, et al. Depression one year after hemorrhagic stroke is associated with late worsening of outcomes. *Neurorehabilitation.* 2017;41(1):179-87.

18. Barker-Collo S, Krishnamurthi R, Witt E, Theadom A, Starkey N, Barber PA, et al. Depression and Anxiety Across the First Year After Ischemic Stroke: Findings from a Population-Based New Zealand ARCOS-IV Study. *Brain Impair.* 2017;18(3):265-76
19. Dong L, Sanchez BN, Skolarus LE, Stulberg E, Morgenstern LB, Lisabeth LD. Sex difference in prevalence of depression after stroke. *Neurology.* 2020;94(19):e1973-e83.
20. Roth DL, Haley WE, Sheehan OC, Liu C, Clay OJ, Rhodes JD, et al. Depressive Symptoms After Ischemic Stroke Population-Based Comparisons of Patients and Caregivers With Matched Controls. *Stroke.* 2020;51(1):54-60.
21. Ojagbemi A, Bello T, Owolabi M, Baiyewu O. Prevalence, predictors, and prognoses of prestroke neuropsychiatric symptoms at 3 months poststroke. *International Psychogeriatrics.* 2021;33(8):827-34.
22. Ojagbemi A, Akinyemi J, Wahab K, Owolabi L, Arulogun O, Akpalu J, et al. Pre-Stroke Depression in Ghana and Nigeria: Prevalence, Predictors and Association With Poststroke Depression. *Journal of Geriatric Psychiatry and Neurology.* 2022;35(1):121-7.
23. Shin M, Sohn MK, Lee J, Kim DY, Shin YI, Oh GJ, et al. Post-Stroke Depression and Cognitive Aging: A Multicenter, Prospective Cohort Study. *Journal of Personalized Medicine.* 2022;12(3).
24. Blochl M, Nestler S. Long-term Changes in Depressive Symptoms before and after Stroke. *Neurology.* 2022;99(7):E720-E9.
