# Supplementary material for: Prevalence and natural history of depression after stroke: A systematic review and meta-analysis of observational studies
Source: PubMed Central journal article supplement (PMC10047522; doi:10.1371/journal.pmed.1004200), 2023-03-28
Supplement: pmed.1004200.s015.pdf [file pmed.1004200.s015.pdf]

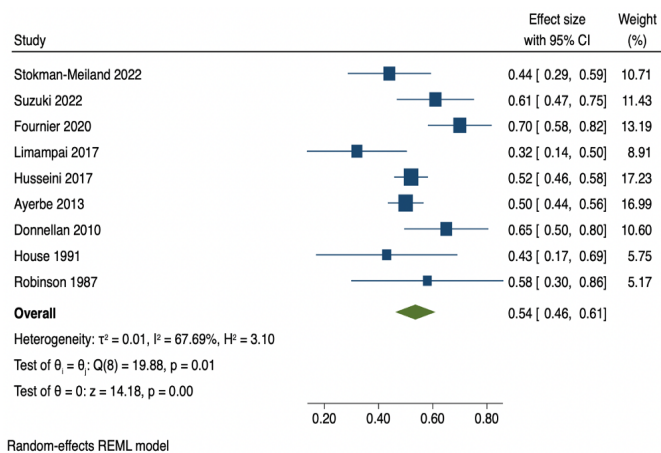

## Reference

1. Stokman-Meiland DCM, Groeneveld IF, Arwert HJ, van der Pas SL, Meesters JLL, Mishre RRD, et al. The course of depressive symptoms in the first 12 months post-stroke and its association with unmet needs. *Disability and Rehabilitation*. 2022;44(3):428-35.
2. Suzuki, A., et al. The Prevalence and Course of Neuropsychiatric Symptoms in Stroke Patients Impact Functional Recovery During in-Hospital Rehabilitation. *Topics in Stroke Rehabilitation* 29(1) (2022): 1-8.
3. Fournier LE, Beauchamp JES, Zhang X, Bonojo E, Love M, Cooksey G, et al. Assessment of the Progression of Poststroke Depression in Ischemic Stroke Patients Using the Patient Health Questionnaire-9. *Journal of Stroke & Cerebrovascular Diseases*. 2020;29(4):8.
4. Limampai P, Wongsrithep W, Kuptniratsaikul V. Depression after stroke at 12-month follow-up: a multicenter study. *International Journal of Neuroscience*. 2017;127(10):887-92.
5. El Husseini N, Goldstein LB, Peterson ED, Zhao X, Olson DM, Williams JW, Jr., et al. Depression Status Is Associated with Functional Decline Over 1-Year Following Acute Stroke. *Journal of Stroke & Cerebrovascular Diseases*. 2017;26(7):1393-9.
6. Ayerbe L, Ayis S, Crichton S, Wolfe CDA, Rudd AG. The natural history of depression up to 15 years after stroke: The South London stroke register. *Stroke*. 2013;44(4):1105-10.
7. Donnellan C, Hickey A, Hevey D, O'Neill D. Effect of mood symptoms on recovery one year after stroke. *International Journal of Geriatric Psychiatry*. 2010;25(12):1288-95.
8. House A, Dennis M, Mogridge L, Warlow C, Hawton K, Jones L. Mood disorders in the year after first stroke. *British Journal of Psychiatry*. 1991;158(JAN.):83-92.
9. Robinson RG, Bolduc PL, Price TR. Two-year longitudinal study of poststroke mood disorders: Diagnosis and outcome at one and two years. *Stroke*. 1987;18(5):837-43.
